# Supplementary material for: Governor Vessel Moxibustion Therapy Improves Microbiota Structure in Ankylosing Spondylitis Patients
Source: Hindawi journal article supplement (doi:10.1155/2021/9370758), 2021-12-20

Ginger

Moxa

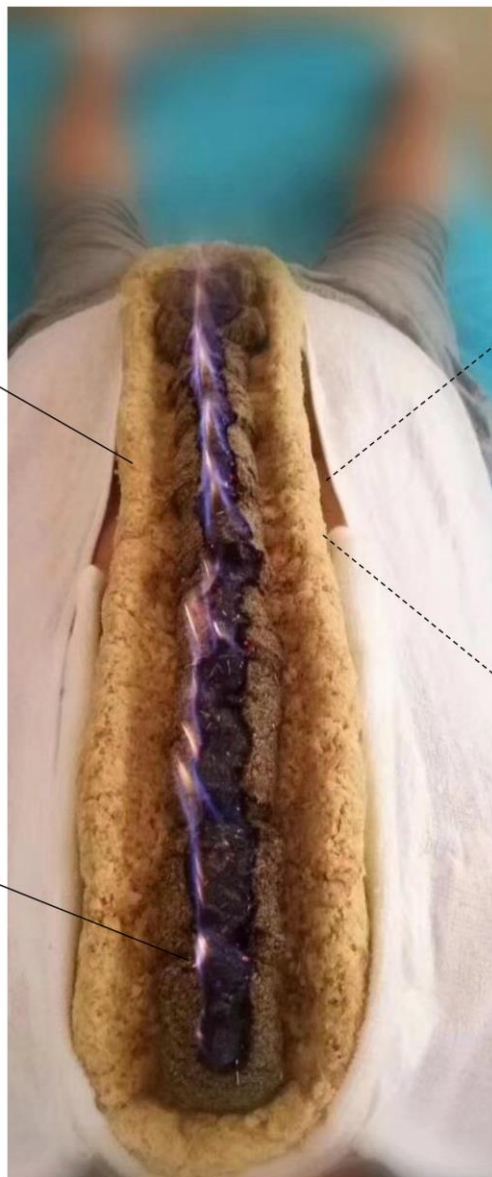

Traditional Chinese medicines

With white peony

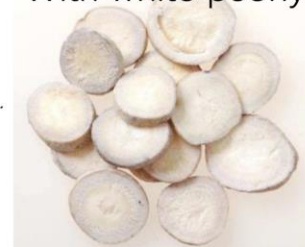

musk

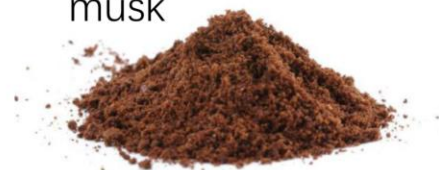

Chuanxiong

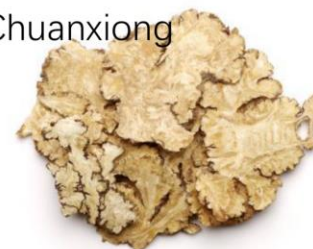

Haifengteng

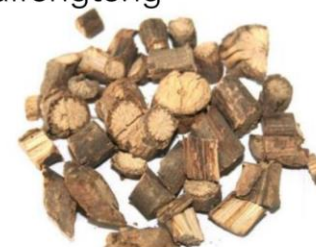

Supplement: f1 [file 9370758.f1.pdf]
